# Supplementary material
Source: PubMed Central journal article supplement (PMC5067819)

**ONLINE SUPPLEMENT  
SUPPLEMENTARY TABLES AND  
FIGURES**

**Table E1:** Baseline characteristics of the Sleep Heart Health Study cohort by FEV<sub>1</sub> category

|                                         | FEV <sub>1</sub> group 1 (≥ 3.19)<br>N =1529 | FEV <sub>1</sub> group 2 (2.61-3.18)<br>N=1536 | FEV <sub>1</sub> group 3 (2.10-2.60)<br>N =1551 | FEV <sub>1</sub> group 4 (≤ 2.09)<br>N =1558 |
|-----------------------------------------|----------------------------------------------|------------------------------------------------|-------------------------------------------------|----------------------------------------------|
| Age, years                              | 57.3 (9.1)                                   | 60.6 (9.6)                                     | 63.6 (10.1)                                     | 71.0 (9.9)                                   |
| FEV <sub>1</sub> , L                    | 3.73 (0.44)                                  | 2.88 (0.16)                                    | 2.35 (0.15)                                     | 1.68 (0.35)                                  |
| FVC, L                                  | 4.86 (0.64)                                  | 3.79 (0.40)                                    | 3.13 (0.36)                                     | 2.34 (0.52)                                  |
| FEV <sub>1</sub> /FVC, %                | 77.1 (5.7)                                   | 76.5 (6.5)                                     | 75.7 (7.1)                                      | 72.6 (10.3)                                  |
| BMI, kg/m <sup>2</sup>                  | 28.2 (4.5)                                   | 28.5 (5.2)                                     | 28.8 (5.8)                                      | 28.4 (5.7)                                   |
| Sex, %                                  |                                              |                                                |                                                 |                                              |
| Women                                   | 157 (10%)                                    | 738 (48%)                                      | 1099 (71%)                                      | 1264 (81%)                                   |
| Men                                     | 1372 (90%)                                   | 798 (52%)                                      | 452 (29%)                                       | 294 (19%)                                    |
| Race,%                                  |                                              |                                                |                                                 |                                              |
| White                                   | 1312 (86%)                                   | 1247 (81%)                                     | 1156 (75%)                                      | 1105 (71%)                                   |
| African-American                        | 47 (3%)                                      | 73 (5%)                                        | 107 (7%)                                        | 239 (15%)                                    |
| Native American                         | 93 (6%)                                      | 141 (9%)                                       | 187 (12%)                                       | 159 (10%)                                    |
| Hispanic                                | 66 (4%)                                      | 56 (4%)                                        | 76 (5%)                                         | 36 (2%)                                      |
| Other                                   | 11 (1%)                                      | 19 (1%)                                        | 25 (2%)                                         | 19 (1%)                                      |
| Smoking Status, %                       |                                              |                                                |                                                 |                                              |
| Never                                   | 607 (40%)                                    | 700 (46%)                                      | 776 (50%)                                       | 732 (47%)                                    |
| Former                                  | 733 (48%)                                    | 667 (44%)                                      | 604 (39%)                                       | 629 (41%)                                    |
| Current                                 | 177 (12%)                                    | 160 (10%)                                      | 162 (11%)                                       | 185 (12%)                                    |
| Hypertension, %                         | 605 (40%)                                    | 737 (48%)                                      | 858 (55%)                                       | 1065 (69%)                                   |
| Cardiovascular disease <sup>†</sup> , % | 176 (12%)                                    | 210 (14%)                                      | 239 (16%)                                       | 359 (24%)                                    |
| Deaths, %                               | 182 (12%)                                    | 275 (18%)                                      | 356 (23%)                                       | 644 (41%)                                    |
| Follow-up time, person-years            | 17641.1                                      | 17351.0                                        | 16731.4                                         | 15368.2                                      |
| Mortality rate, per 1000 person-years   | 10.3                                         | 15.8                                           | 21.3                                            | 41.9                                         |

p < 0.0001 for comparisons of age, FEV<sub>1</sub>, FEV<sub>1</sub>/FVC, gender, race, smoking status, hypertension, diabetes, cardiovascular disease across RDI categories using  $\chi^2$  and analysis of variance to compare categorical and continuous variables, respectively. P < 0.05 for comparisons of body mass index, p = 0.01 for comparison of across categories. Values represent mean (standard deviation) or percentage. <sup>†</sup>Cardiovascular disease defined as presence of angina, heart failure, myocardial infarction, stroke, or any coronary revascularization procedure.

**Table E2:** Adjusted hazard ratios for FVC (per 200 mL decrease) and all-cause mortality in the Sleep Heart Health Study.

|                      | AHI < 5 events/hr | AHI ≥ 5 events/hr |
|----------------------|-------------------|-------------------|
| Model 1 <sup>†</sup> | 1.13 (1.12, 1.15) | 1.10 (1.08, 1.11) |
| Model 2 <sup>‡</sup> | 1.08 (1.06, 1.10) | 1.06 (1.04, 1.08) |
| Model 3 <sup>§</sup> | 1.07 (1.05, 1.09) | 1.05 (1.03, 1.07) |

<sup>†</sup>Model 1: FVC (continuous), AHI (categorical), FVC x AHI interaction.

<sup>‡</sup>Model 2: FVC (continuous), AHI (categorical), FVC x AHI interaction, age, gender, race, BMI, smoking status.

<sup>§</sup>Model 3: FVC (continuous), AHI (categorical), FVC x AHI interaction, age, gender, race, BMI, smoking status, hypertension, and cardiovascular disease.

p-values for interaction term to Models 1, 2, and 3: 0.004, 0.172, 0.072.

**Table E3:** Adjusted hazard ratios for FVC (per 200mL decrease) associated with all-cause mortality.

|                      | Apnea-hypopnea index (events/hr) |                   |                   |                   |
|----------------------|----------------------------------|-------------------|-------------------|-------------------|
|                      | < 5.0                            | 5.0-14.9          | 15.0-29.9         | ≥30.0             |
| Model 1 <sup>†</sup> | 1.14 (1.12, 1.15)                | 1.10 (1.08, 1.12) | 1.10 (1.07, 1.13) | 1.09 (1.04, 1.13) |
| Model 2 <sup>‡</sup> | 1.08 (1.06, 1.10)                | 1.06 (1.04, 1.09) | 1.06 (1.03, 1.10) | 1.05 (1.01, 1.09) |
| Model 3 <sup>§</sup> | 1.07 (1.05, 1.09)                | 1.05 (1.03, 1.07) | 1.05 (1.02, 1.09) | 1.03 (0.99, 1.08) |

<sup>†</sup>Model 1: FVC (continuous), AHI (categorical), FVC x AHI interaction.

<sup>‡</sup>Model 2: FVC (continuous), AHI (categorical), FVC x AHI interaction, age, gender, race, BMI, smoking status.

<sup>§</sup>Model 3: FVC (continuous), AHI (categorical), FVC x AHI interaction, age, gender, race, BMI, smoking status, hypertension, and cardiovascular disease.

p-values for interaction between AHI categories and FVC as a trend in Models 1, 2 and 3: 0.009, 0.141, 0.061.

**Table E4:** Adjusted hazard ratios for FEV<sub>1</sub>/FVC (per 1% decrease) and all-cause mortality

|                      | AHI < 5 events/hr | AHI ≥ 5 events/hr |
|----------------------|-------------------|-------------------|
| Model 1 <sup>†</sup> | 1.05 (1.04, 1.06) | 1.01 (1.00, 1.02) |
| Model 2 <sup>‡</sup> | 1.02 (1.01, 1.03) | 1.00 (0.99, 1.01) |
| Model 3 <sup>§</sup> | 1.02 (1.01, 1.03) | 1.00 (0.99, 1.01) |

<sup>†</sup>Model 1: FEV<sub>1</sub>/FVC (continuous), AHI (categorical), FEV<sub>1</sub>/FVC x AHI interaction.

<sup>‡</sup>Model 2: FEV<sub>1</sub>/FVC (continuous), AHI (categorical), FEV<sub>1</sub>/FVC x AHI interaction, age, gender, race, BMI, smoking status.

<sup>§</sup>Model 3: FEV<sub>1</sub>/FVC (continuous), AHI (categorical), FEV<sub>1</sub>/FVC x AHI interaction, age, gender, race, BMI, smoking status, hypertension, and cardiovascular disease.

p-values for interaction term to Models 1, 2, and 3: <0.001, 0.003, 0.021.

**Table E5:** Adjusted hazard ratios for FEV<sub>1</sub>/FVC (per 1% decrease) and all-cause mortality.

|                      | Apnea-hypopnea index (events/hr) |                   |                   |                   |
|----------------------|----------------------------------|-------------------|-------------------|-------------------|
|                      | < 5.0                            | 5.0-14.9          | 15.0-29.9         | ≥30.0             |
| Model 1 <sup>†</sup> | 1.05 (1.04, 1.06)                | 1.03 (1.01, 1.04) | 1.00 (0.99, 1.02) | 1.00 (0.97, 1.02) |
| Model 2 <sup>‡</sup> | 1.02 (1.01, 1.03)                | 1.01 (1.00, 1.02) | 0.99 (0.97, 1.01) | 0.99 (0.97, 1.02) |
| Model 3 <sup>§</sup> | 1.02 (1.01, 1.03)                | 1.01 (1.00, 1.02) | 0.99 (0.97, 1.01) | 0.99 (0.97, 1.02) |

<sup>†</sup>Model 1: FEV<sub>1</sub>/FVC (continuous), AHI (categorical), FEV<sub>1</sub>/FVC x AHI interaction.

<sup>‡</sup>Model 2: FEV<sub>1</sub>/FVC (continuous), AHI (categorical), FEV<sub>1</sub>/FVC x AHI interaction, age, gender, race, BMI, smoking status.

<sup>§</sup>Model 3: FEV<sub>1</sub>/FVC (continuous), AHI (categorical), FEV<sub>1</sub>/FVC x AHI interaction, age, gender, race, BMI, smoking status, hypertension, and cardiovascular disease.

p-values for interaction between AHI categories and FEV<sub>1</sub>/FVC as a trend in Models 1, 2 and 3: <0.001, 0.001, 0.004.

**Figure E1:** Scatterplot of FEV<sub>1</sub> (L) versus FVC (L).

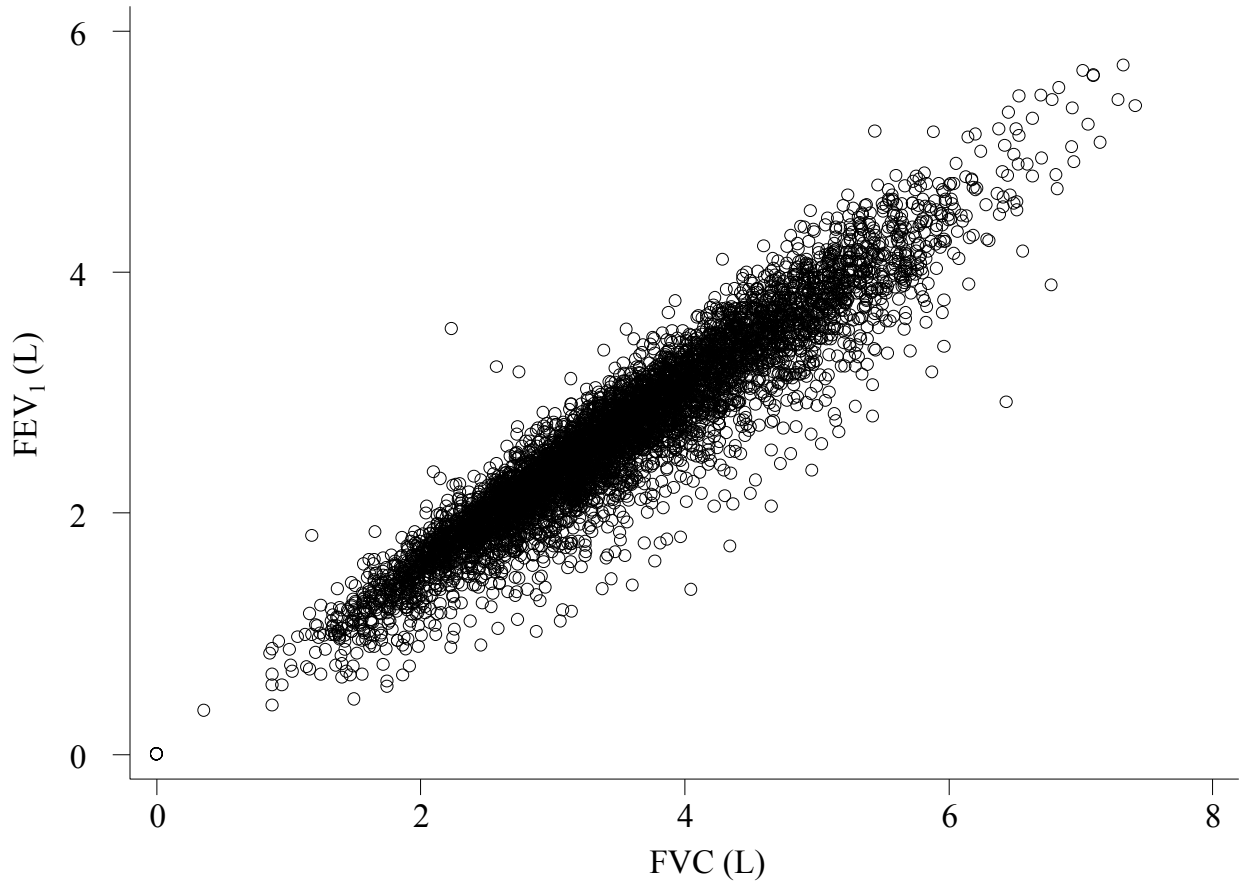

Supplement: 10.1164_rccm.201511-2178OC_putcha_data_supplement.pdf [file 10.1164_rccm.201511-2178OC_putcha_data_supplement.pdf]
